# Supplementary material for: Self-Management of Subclinical Common Mental Health Disorders (Anxiety, Depression and Sleep Disorders) Using Wearable Devices
Source: Int J Environ Res Public Health. 2023 Feb 1;20(3):2636. doi: 10.3390/ijerph20032636 (PMC9916237; doi:10.3390/ijerph20032636)
Supplement: Supplementary file 1 [file ijerph-20-02636-s001.zip]

Archive with 4 entries (4 files):
- Economic_cost_data.xlsx
- Methodological_quality.xlsx
- PRISMA_2020_checklist.pdf
- Technologies.xlsx
