# Supplementary material for: Self-Management of Subclinical Common Mental Health Disorders (Anxiety, Depression and Sleep Disorders) Using Wearable Devices
Source: Int J Environ Res Public Health. 2023 Feb 1;20(3):2636. doi: 10.3390/ijerph20032636 (PMC9916237; doi:10.3390/ijerph20032636)
Supplement: Supplementary file 1 [file ijerph-20-02636-s001.zip › Economic_cost_data.xlsx]

## Sheet: Economic & Population Data
	Target Population (M)	Anxiety disorder prevelance			Depressive disorder prevelance			Sleep disorder prevelance			Total prevelenace			Affected population (M)
Group		Low	Mid	High	Low	Mid	High	Low	Mid	High	Low	Mid	High	Low	Mid	High	average	Ref
Young Adults	5.2	0.18	0.26	0.34	0.2	0.265	0.33	0.28	0.485	0.69	0.22	0.336667	0.453333	1.144	1.75067	2.35733	1.75067	[56, 58]
Adults	67.1	0.01	0.04	0.07	0.17	0.225	0.28	0.32	0.35	0.38	0.166667	0.205	0.243333	11.1833	13.7555	16.3277	13.7555	[56, 59, 60]
Older Adults	11.8	0.22	0.25	0.28	0.05	0.06	0.07	0.36	0.44	0.52	0.21	0.25	0.29	2.478	2.95	3.422	2.95	[56, 61, 62]
University Students	2.66	0.17	0.315	0.46	0.17	0.27	0.37	0.3	0.3	0.3	0.213333	0.295	0.376667	0.567467	0.7847	1.00193	0.7847	[57]
Employees	30.3	0.09	0.1	0.11	0.185	0.245	0.305	0.3	0.4175	0.535	0.191667	0.254167	0.316667	5.8075	7.70125	9.595	7.70125	[56]

## Sheet: Level of Engagement
		Attrition rate				Retention rate
Device Type	Ownership	Low	Mid	High	Average	Low	Mid	High	Average	Ref
Headband, Glasses	0.05	0.5*			0.5	0.5	0.5	0.5	0.5
Headband	0.05				0.5	0.5	0.5	0.5	0.5
Wristband	0.14	0.26	0.34	0.42	0.34	0.74	0.66	0.58	0.66	[53, 66]
SmartWatch	0.13	0.37	0.57	0.77	0.57	0.63	0.43	0.23	0.43	[64, 65]
SmartWatch	0.13	0.37	0.57	0.77	0.57	0.63	0.43	0.23	0.43	[64, 65]
SmartWatch	0.13	0.37	0.57	0.77	0.57	0.63	0.43	0.23	0.43	[64, 65]
SmartWatch	0.13	0.37	0.57	0.77	0.57	0.63	0.43	0.23	0.43	[64, 65]
Necklace	0.05	0.3	0.15		0.225	0.7	0.85	1	0.775	[64]
SmartWatch	0.13	0.37	0.57	0.77	0.57	0.63	0.43	0.23	0.43	[64, 65]
SmartWatch	0.13	0.37	0.57	0.77	0.57	0.63	0.43	0.23	0.43	[64, 65]
Bracelet	0.14	0.26	0.34	0.42	0.34	0.74	0.66	0.58	0.66	[53]
SmartWatch, Smart Shirt	0.13	0.37	0.57	0.77	0.57	0.63	0.43	0.23	0.43	[64, 65]
