# Supplementary material for: Self-Management of Subclinical Common Mental Health Disorders (Anxiety, Depression and Sleep Disorders) Using Wearable Devices
Source: Int J Environ Res Public Health. 2023 Feb 1;20(3):2636. doi: 10.3390/ijerph20032636 (PMC9916237; doi:10.3390/ijerph20032636)
Supplement: Supplementary file 1 [file ijerph-20-02636-s001.zip › Methodological_quality.xlsx]

## Sheet: methdological quality
Study	Sample Size	Population included	Intervention assessed	Comparison tested	Outcome involved	Timeframe measured	Study Type
[27]	55	Young Adults	Well-being (Biofeedback)	Control & Experament group	Stress reduction	8 Weeks	Randomised control study
[28]	55	Adults	Detection	-	Treatment response identification	2 Weeks	Randomised double-blind placebo study
[29]	183	Adults	Self-Monitoring	-	Stress Identificaiton	-	-
[30]	23	Employees	Validation	-	Stress Identificaiton	-	-
[31]	20	University Students	Self-Monitoring	-	Stress Identificaiton	4 Weeks	Pilot study
[32]	201	University Students	Self-Monitoring	-	Stress Identificaiton	4 Weeks	Pilot study
[33]	82	University Students	Self-Monitoring	-	Stress Identificaiton	4 Weeks	Pilot study
[34]	169	Employees	Well-being (Biofeedback)	Control & Experament group	Stress reduction	4 Weeks	Randomised control study
[35]	328	Employees	Self-Monitoring	-	Stress Identificaiton	1 Week	Cross-Sectional study
[36]	5895	-	Self-Monitoring	-	Stress Identificaiton	-	-
[37]	80	Older Adults	Self-Monitoring	Control & Experament group	Stress Identificaiton	8 Weeks	Randomised control study
[38]	196	Employees	Self-Monitoring	-	Stress Identificaiton	10 Weeks	Pilot study
