# Supplementary material for: Self-Management of Subclinical Common Mental Health Disorders (Anxiety, Depression and Sleep Disorders) Using Wearable Devices
Source: Int J Environ Res Public Health. 2023 Feb 1;20(3):2636. doi: 10.3390/ijerph20032636 (PMC9916237; doi:10.3390/ijerph20032636)
Supplement: Supplementary file 1 [file ijerph-20-02636-s001.zip › Technologies.xlsx]

## Sheet: Technologies
Wearable Device					Algorithm					Demographic					Mental Health Disorder				Study
Manufacturer	Origin	Interface	Wearable Model	Device Type	ML Model(s)	Accuracy	Biometric Signals	Self reporting scales	Evaluation scales	Participants (Male %)	Participants (Female %)	Participants age range	Participants Age (mean)	Target Group	Targeted disorder	Intended Purpose	Passive sensing	Intervention	Sample size	Reference
InteraXon Inc & SmithOptics Inc.	Canada	Android/iOS	Muse™, Lowdown Focus	Headband, Glasses		0.77	EEG, HRV	PSS, POMS, STAI	BDI, BSI	0.69	0.31	18-25	23.2	Young Adults	Stress, Anxiety	Wellbeing (Biofeedback)	N	Y	55	[27]
Eee Holter Technology Co.	Taiwan	Android/iOS	Mindo-4S Jellyfish	Headband	SVM RBF	0.81	EEG	HAM-D		0.88	0.12	33-59	46.5	Adults	Depression	Detection	Y	N	55	[28]
Empatica	USA	SmartWatch	E4	Wristband	Binary logistic regression model	0.85	GSR					33-59		Adults	Stress	Self-Monitoring	Y	N	183	[29]
Apple	USA	SmartWatch	Watch 6	SmartWatch			HR			0.7	0.3	22-56	30.35	Employees	Stress	Validation	Y	N	23	[30]
Samsung	Korea	SmartWatch	Gear S3 Frontier	SmartWatch	SVM RF	0.96	Physical Activity, HR	EMA, PHQ-9	BDI-II, STAI			33-59		University Students	Depression	Self-Monitoring	Y	N	20	[31]
Affectiva	USA	SmartWatch	Q-sensor	SmartWatch	SVM RBF	0.87	Physical Activity, SC, S-Temp, Ambient light	PSS		0.55	0.45	18-25		University Students	Stress, Depression, Anxiety	Self-Monitoring	Y	N	201	[32]
Microsoft	USA	SmartWatch	Smartband 2	SmartWatch	Neural Network (NN)	0.78	SC, Sleep, Calorie intake, S-Temp, HR, HRV, PPG, RR	STAI	PSS, SRI	0.35	0.65	17-38		University Students	Stress	Self-Monitoring	Y	N	82	[33]
Spire Health	USA	Android/iOS	Spire Stone	Necklace	-	-	Respiratory Rate	MASQ	CDC HRQOL-14	0.45	0.55		33	Employees	Stress	Wellbeing (Biofeedback)	Y	Y	169	[34]
Intelligent Galaxy	USA	SmartWatch	Chillband	SmartWatch	Statistical mixed design model	0.75	Physical Activity, ECG, SC, S-Temp, HR, Circadian Harmonic	PSS		0.57	0.43		38.9	Employees	Stress	Self-Monitoring	Y	N	328	[35]
Cambridge Neurotechnology Ltd	UK	SmartWatch	Actiwatch	SmartWatch	Feature extraction & RF	0.89	Physical Activity	MADRS							Depression	Self-Monitoring	Y	N	5895	[36]
Acculi Labs Pvt. Ltd	India	Android/iOS	LENS	Bracelet	-	0.93	Physical Activity, S-Temp, menstrual cycle, Sp02, Sleep monitoring, PPG	HAM-D		0.5	0.5	50-70		Older Adults	Depression	Self-Monitoring	N	N	80	[37]
FitBit, OMsignal	USA	SmartWatch	OMsignal smart-shirt, Fitbit Charge 2	SmartWatch, Smart Shirt	SVM RBF	0.92	Physical Activity, HR, HRV, Sleep, ECG, PPG, RR, GSR	daily survey		0.33	0.77	28.8-48.4	28.8-48.4	Employees	Stress, Anxiety	Self-Monitoring	Y	N	196	[38]
